# Supplementary material for: Attitudes of tertiary students towards a group project in a science unit
Source: Royal Society of Chemistry journal article supplement (doi:10.1039/c1rp90037d), 2011-01-01
Supplement: c1rp90037d_esi.pdf [file c1rp90037d_esi.pdf]

# Attitudes of tertiary students towards a group project in a science unit

Emma K Bartle, Jan Dook and Mauro Mocerino

Published in *Chemistry Education Research and Practice*, Vol. 12, no. 3, July 2011

## Supplementary Data

### Appendix one: Pre-survey

**Study:** Attitudes of tertiary students towards a group project in a science unit

1. Full name \_\_\_\_\_

2. Gender male female

3. Age group under 18 18-25 25-40  
40-60 60 and over

4. What course are you studying at UWA? \_\_\_\_\_

5. What year of your studies are you in? \_\_\_\_\_

6. Is this unit an elective or core unit of your course? core elective

7. Has your group chosen their topic for the assignment? yes no

If yes, how would you describe your familiarity with your chosen science topic?

\_\_\_\_\_

1 2 3 4 5  
*low high*

8. Based on your answer to Q7, how difficult do you think this assignment will be?

\_\_\_\_\_

1 2 3 4 5  
*easy hard*

9. How would you describe your level of previous multimedia experience?

\_\_\_\_\_

1 2 3 4 5  
*none high*

**10. Based on your answer to Q9, how difficult do you think this assignment will be?**

---

|             |   |   |   |             |
|-------------|---|---|---|-------------|
| 1           | 2 | 3 | 4 | 5           |
| <i>easy</i> |   |   |   | <i>hard</i> |

**11. How would you describe your level of technology proficiency?**

---

|             |   |   |   |             |
|-------------|---|---|---|-------------|
| 1           | 2 | 3 | 4 | 5           |
| <i>none</i> |   |   |   | <i>high</i> |

**12. Based on your answer to Q11, how difficult do you think this assignment will be?**

---

|             |   |   |   |             |
|-------------|---|---|---|-------------|
| 1           | 2 | 3 | 4 | 5           |
| <i>easy</i> |   |   |   | <i>hard</i> |

**13. Do you understand the learning outcomes of the iMovie assignment?**

yes
 no
 partially

**14. Do you feel that you have received sufficient direction for this assignment?**

yes
 no
 unsure

**15. Do you prefer been given structured or unstructured assignment tasks?**

structured
 unstructured

**16. How familiar are with you with the other members of your group for this assignment?**

---

|                   |   |   |   |                      |
|-------------------|---|---|---|----------------------|
| 1                 | 2 | 3 | 4 | 5                    |
| <i>unfamiliar</i> |   |   |   | <i>very familiar</i> |

**17. What skills do you think you will contribute to the group in this assignment? (tick as many as required)**

organisational skills
 creativity
 software editing skills  
research
 leadership
 time management  
other (please describe) \_\_\_\_\_



**24. What do you think some of the challenges in completing this group assignment might be?**

---

---

---

**Thankyou for your participation**

---

**Appendix two: post-survey**

**Study:** Attitudes of tertiary students towards a group project in a science unit

**25. Full name** \_\_\_\_\_

**26. Before starting the assignment, how familiar were you with your chosen science topic?**

\_\_\_\_\_

|            |   |   |   |             |
|------------|---|---|---|-------------|
| 1          | 2 | 3 | 4 | 5           |
| <i>low</i> |   |   |   | <i>high</i> |

**27. Based on your answer to Q2, how difficult did you find this assignment?**

\_\_\_\_\_

|             |   |   |   |             |
|-------------|---|---|---|-------------|
| 1           | 2 | 3 | 4 | 5           |
| <i>easy</i> |   |   |   | <i>hard</i> |

**28. How did you describe your level of multimedia experience prior to starting this assignment?**

\_\_\_\_\_

|             |   |   |   |             |
|-------------|---|---|---|-------------|
| 1           | 2 | 3 | 4 | 5           |
| <i>none</i> |   |   |   | <i>high</i> |

**29. Based on your answer to Q4, how difficult did you find this assignment?**

\_\_\_\_\_

|             |   |   |   |             |
|-------------|---|---|---|-------------|
| 1           | 2 | 3 | 4 | 5           |
| <i>easy</i> |   |   |   | <i>hard</i> |

**30. How did you describe your level of technology proficiency prior to starting this assignment?**

\_\_\_\_\_

|             |   |   |   |             |
|-------------|---|---|---|-------------|
| 1           | 2 | 3 | 4 | 5           |
| <i>none</i> |   |   |   | <i>high</i> |

**31. Based on your answer to Q6, how difficult did you find this assignment?**

---

|             |   |   |   |             |
|-------------|---|---|---|-------------|
| 1           | 2 | 3 | 4 | 5           |
| <i>easy</i> |   |   |   | <i>hard</i> |

**32. Would you prefer to have been given more structure for this assignment?**

yes                      no

**33. Do you think the unstructured nature of the assignment influenced how your group operated?**

yes                      no

**If yes, how?** \_\_\_\_\_

**34. What skills did you contribute to the group in this assignment? (tick as many as required)**

organisational skills                      creativity                      software editing skills

research                      leadership                      time management

other (please describe) \_\_\_\_\_

**35. Do you think group work is an effective learning tool in science?**

yes                      no                      undecided

**Why?** \_\_\_\_\_

\_\_\_\_\_

**36. What are the three main things you learnt from this iMovie assignment?**

|                                                                   |                                                                                                    |
|-------------------------------------------------------------------|----------------------------------------------------------------------------------------------------|
| <input type="checkbox"/> learning how to use iMovie               | <input type="checkbox"/> learning how to storyboard                                                |
| <input type="checkbox"/> learning how to use a digital camera     | <input type="checkbox"/> learning how to research a scientific topic                               |
| <input type="checkbox"/> learning how to work in a group          | <input type="checkbox"/> learning to communicate science effectively                               |
| <input type="checkbox"/> learning to manage time effectively      | <input type="checkbox"/> identifying your personal strengths and weaknesses in a group environment |
| <input type="checkbox"/> learning to co-operate with other people |                                                                                                    |
| <input type="checkbox"/> other (please explain) _____             |                                                                                                    |

**37. What strategy did your group use to complete this assignment? (you may tick more than one if required)**

- dividing tasks evenly between group members
- each group member takes charge of a key aspect of the iMovie assignment
- group members work on all of the tasks together
- divide the tasks according to each member's strengths and skills
- group members work individually on their tasks and only collaborate at the end
- group members work individually on their tasks, but meet regularly with other group members to update them and discuss progress
- other (please explain) \_\_\_\_\_

**38. How much contact did you have with your other group members while completing this assignment?**

- daily
- few times per week
- weekly
- fortnightly
- not at all

**39. What were some of the challenges in completing this group assignment?**

---

---

**Thank you for your participation**
